# Supplementary material for: A comparative study of graphene–hydrogel hybrid bionanocomposites for biosensing
Source: Royal Society of Chemistry journal article supplement (doi:10.1039/c4an01788a), 2014-12-24
Supplement: c4an01788a1.pdf [file c4an01788a1.pdf]

1 **Supplemental information**

2 Table S1. Equivalent circuit analysis of Nyquist plots for various electrode configurations. EIS data was  
3 analyzed with the Randles-Ershler model. Results are shown for charge transfer resistance (R), solution  
4 resistance ( $R_s$ ), Capacitance ( $Q_v$  and  $Q_a$ ), Warburg impedance (W) and Chi-squared (ChiSq).

|                    | Table S1. Nyquist Simulation Results |          |                 |                 |                  |                 |
|--------------------|--------------------------------------|----------|-----------------|-----------------|------------------|-----------------|
|                    | Bare Platinum                        | PGP      | PGP + CHI + AOX | PGP + PNI + AOX | PGP + SILK + AOX | PGP + CNC + AOX |
| R ( $\Omega$ )     | 9.27E+03                             | 7.24E+03 | 1.08E+03        | 3.88E+03        | 5.37E+03         | 4.28E+03        |
| $R_s$ ( $\Omega$ ) | 1.53E+03                             | 7.79E+02 | 4.60E+02        | 6.07E+02        | 6.30E+02         | 7.22E+02        |
| $Q_y$              | 6.85E-05                             | 6.37E-04 | 3.61E-04        | 7.37E+02        | 2.38E-04         | 1.15E+01        |
| $Q_a$              | 3.42E-06                             | 1.50E-04 | 4.30E-04        | 2.58E-04        | 3.20E-04         | 2.40E-04        |
| W                  | 7.59E-01                             | 6.92E-01 | 5.89E-01        | 5.82E-01        | 6.12E-01         | 6.20E-01        |
| ChiSq              | 3.38E-03                             | 3.45E-03 | 3.24E-03        | 3.92E-03        | 2.79E-03         | 1.30E-03        |

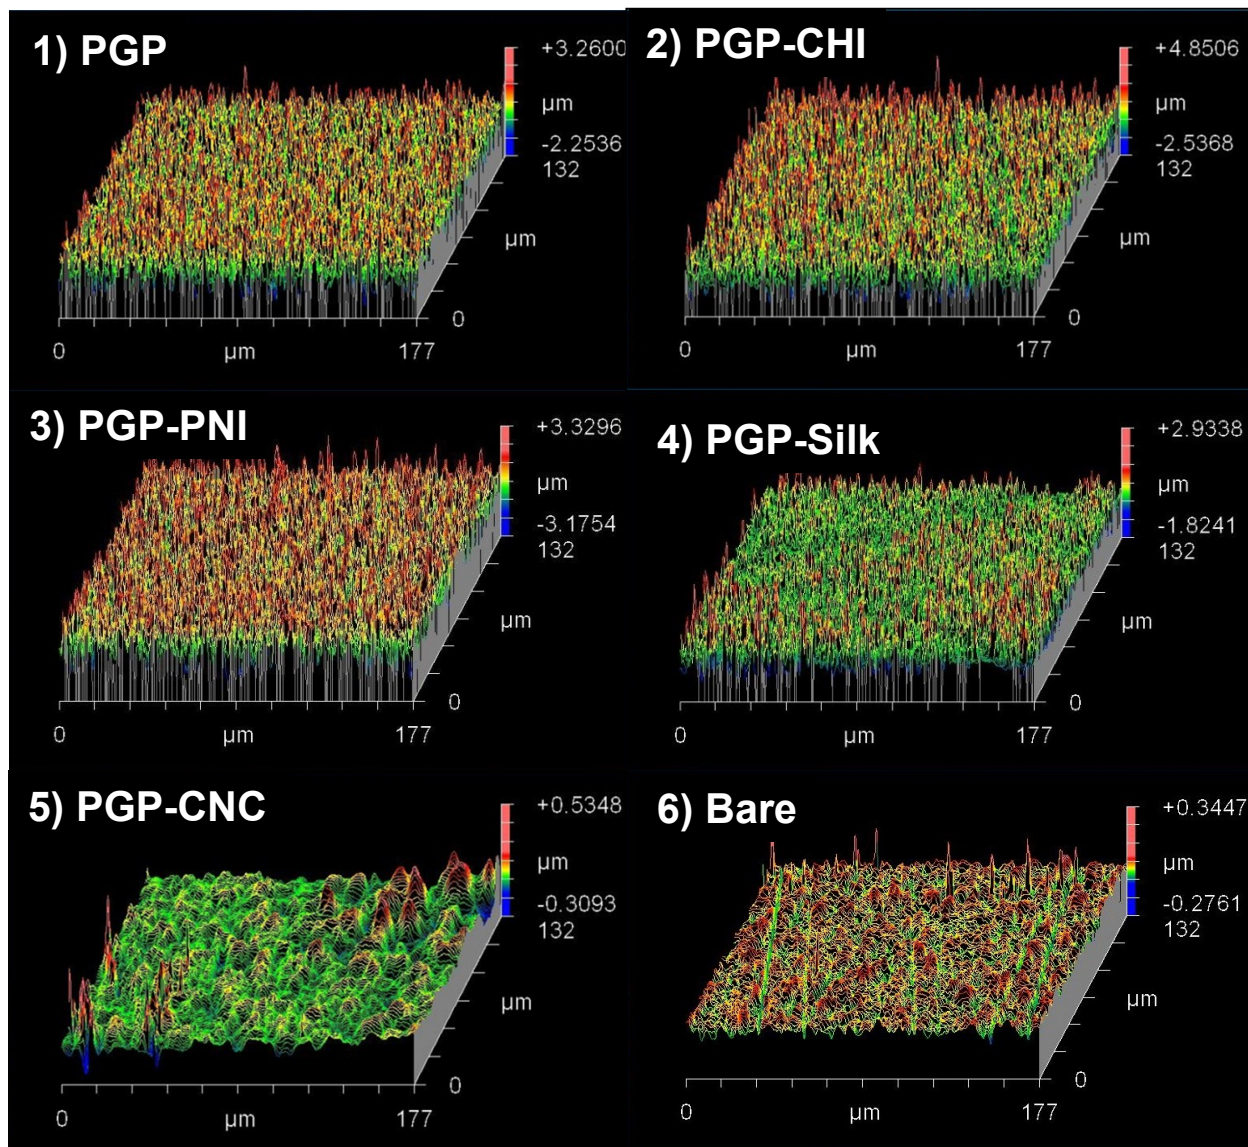

8

9 Figure S1. Representative SWLI images for all bionanocomposites. RMS values for each treatment were  
 10 measured in triplicate ( $n > 3$ ): 1=PGP (RMS =  $587.0 \pm 63.4$  nm), 2=PGP\_CHI (RMS =  $699.5 \pm 113.2$   
 11 nm), 3=PGP\_PNI (RMS =  $712.6 \pm 31.4$  nm), 4=PGP\_SILK (RMS =  $267.9 \pm 144.2$  nm), 5=PGP\_CNC  
 12 (RMS =  $44.8 \pm 0.8$  nm), 6=Bare (RMS =  $25.89 \pm 1.83$  nm).

13

14

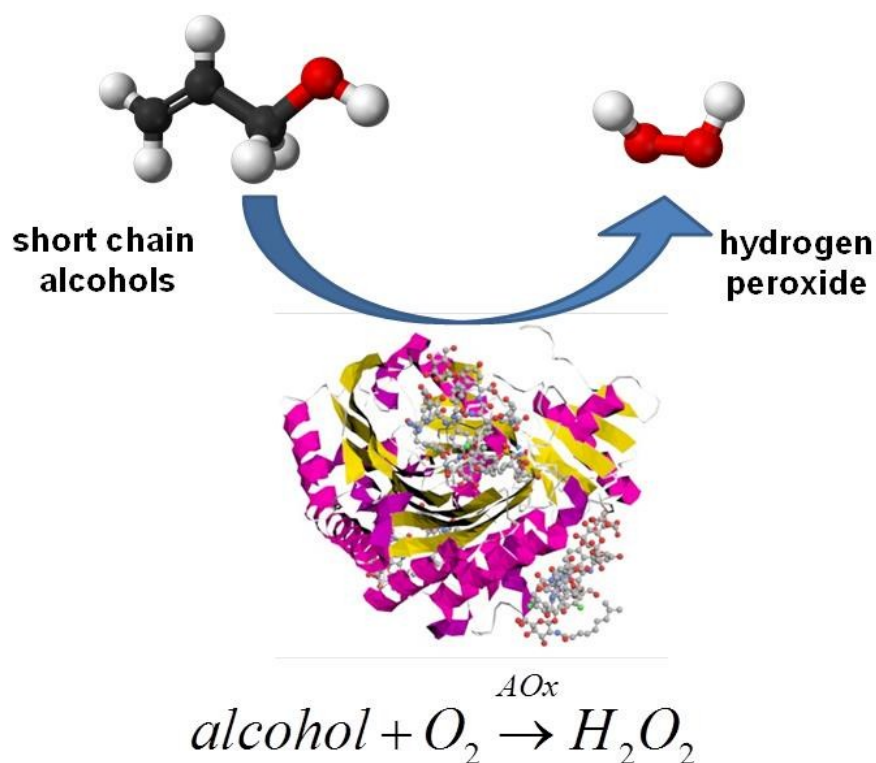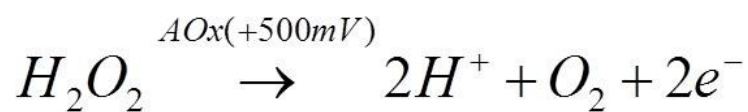

Figure S2. Schematic diagram depicting the oxidation of short chain alcohols by alcohol oxidase (AOx). Byproducts of this reaction are carbonyl compounds and hydrogen peroxide. Under oxidative bias, hydrogen peroxide deprotonates to produce free electrons which are measured as current (not drawn to scale).

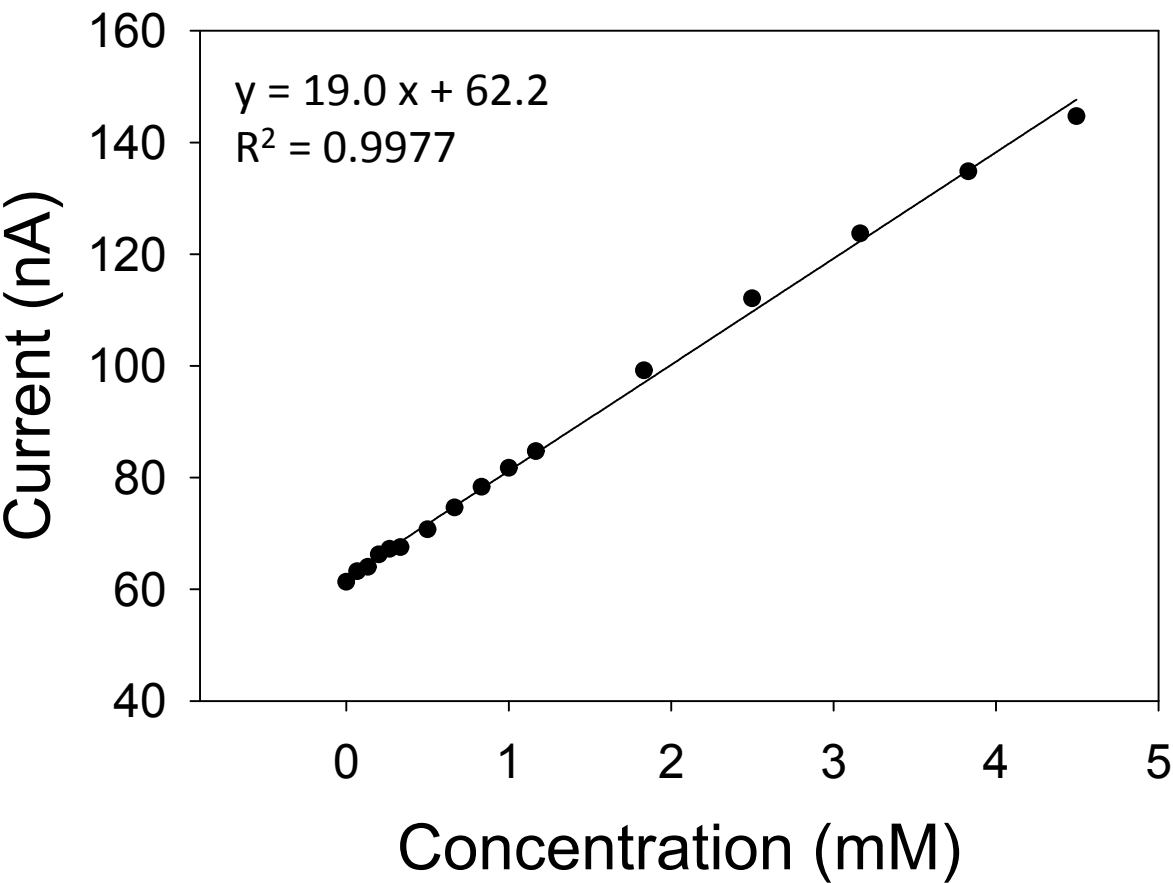

23 Figure S3. Representative average current versus methanol concentration plot from DCPA time series for  
24 AOX immobilized in chitosan on a PGP sandwich nanocomposite platform.

26  
27

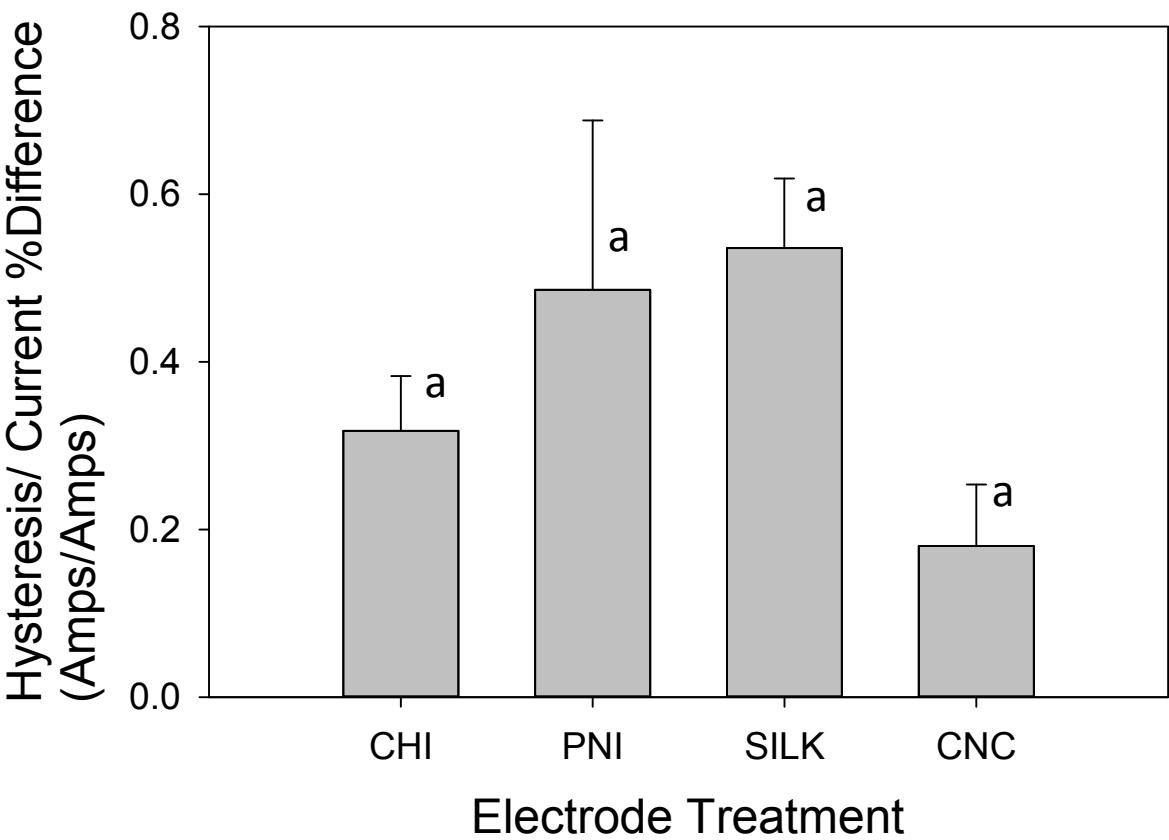

28  
29  
30  
31  
32  
33  
34

Figure S4. Average percent difference in polarization current for treated electrodes. Hysteresis measurements for AOX immobilized in various hydrogels on PGP-modified electrodes ( $n \geq 3$ ). PGP\_CHI= 31.8%  $\pm$  6.6%, PGP\_PNI= 48.6%  $\pm$  20.2%, PGP\_SILK=53.6%  $\pm$  8.3%, PGP\_CNC=18.0%  $\pm$  7.3%. A Tukey pairwise comparison was used to group electrodes with no statistically significant differences in performance (indicated by the letter a).

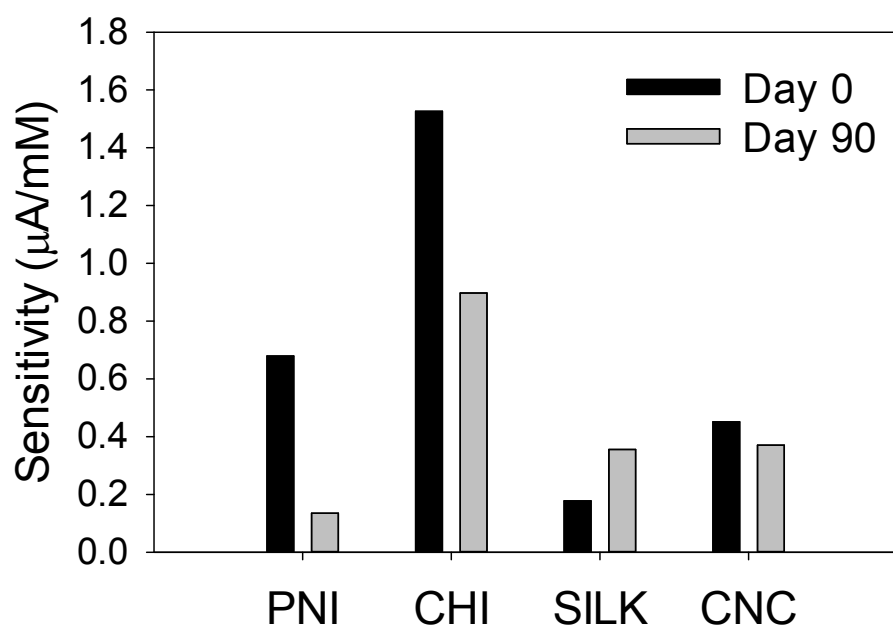

Figure S5. Shelf life study of hybrid bionanocomposites after storage in PBS at 4°C
